# Supplementary material for: Inhibition of CDK1 as a potential therapy for tumors over-expressing MYC
Source: Springer Nature journal article supplement (doi:10.1038/nm1606), 2007-06-24
Supplement: 41591_2007_BFnm1606_MOESM302_ESM.pdf [file 41591_2007_BFnm1606_MOESM302_ESM.pdf]

Supplementary Fig. 1

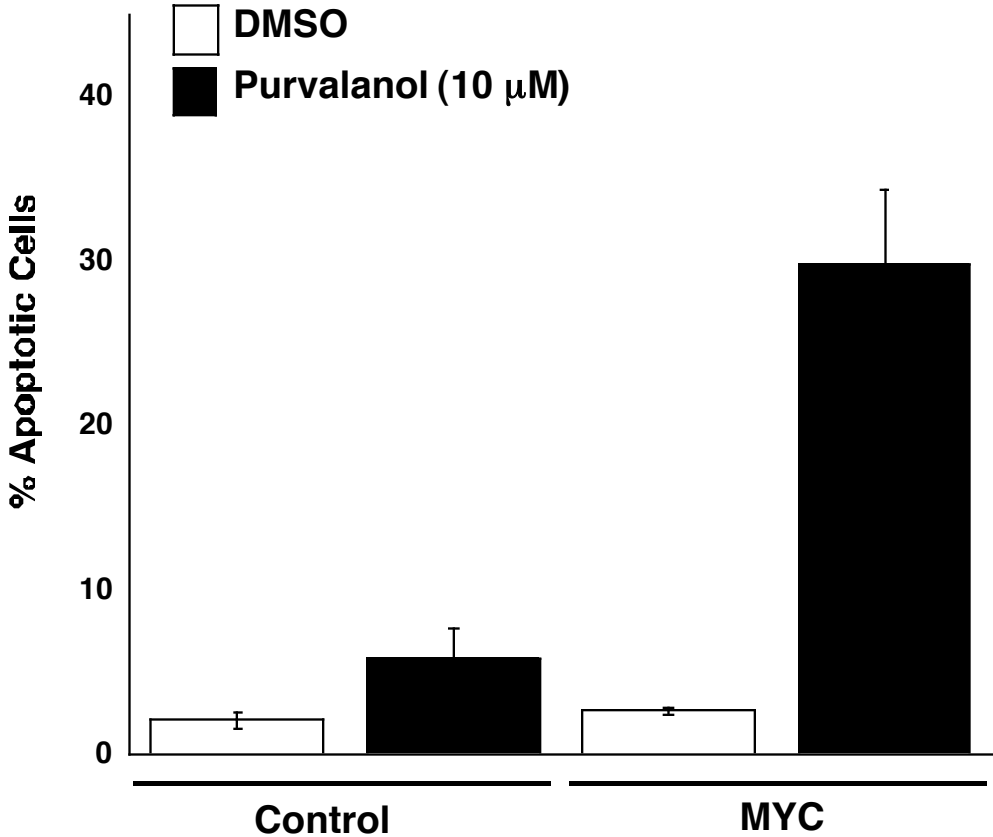

**Supplementary Fig. 1:** Preferential induction of apoptosis in MYC over-expressing RPE cells. Percent apoptotic cells in RPE-NEO (control) or RPE-MYC (MYC) cells determined by FACS after 24 hours of treatment with DMSO or purvalanol.
