# Supplementary material for: Inhibition of CDK1 as a potential therapy for tumors over-expressing MYC
Source: Springer Nature journal article supplement (doi:10.1038/nm1606), 2007-06-24
Supplement: 41591_2007_BFnm1606_MOESM303_ESM.pdf [file 41591_2007_BFnm1606_MOESM303_ESM.pdf]

**Supplementary Fig 2.**

**a**

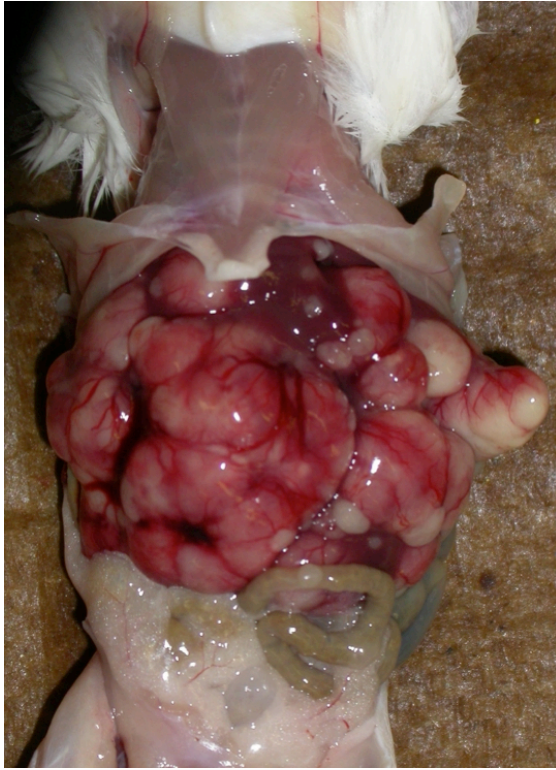

**b**

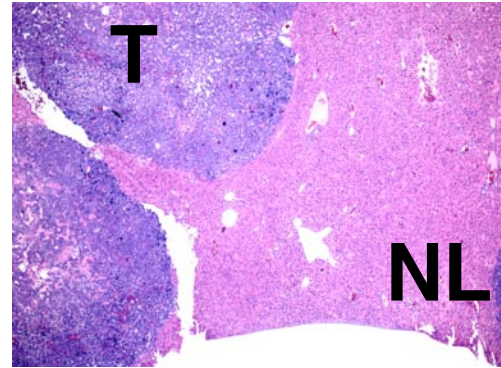

**25X**

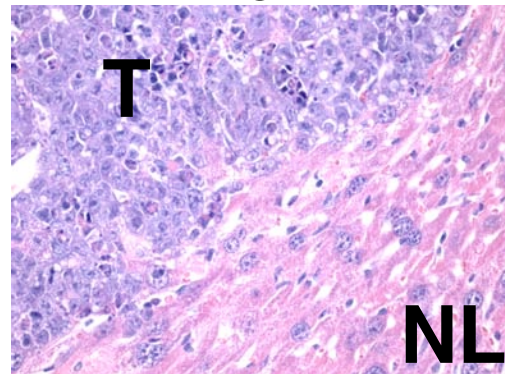

**400X**

**Supplementary Fig. 2:** A *MYC*-dependent mouse liver cancer model. (a) Example of a Tet-O-*MYC* / LAP-tTA transgenic mouse 8 weeks after doxycycline was removed from the diet. The liver is largely replaced by a multi-focal liver tumor. (b) H+E stained samples of normal (NL) and tumor (T) tissue (magnification is indicated).
