# Supplementary material for: Inhibition of CDK1 as a potential therapy for tumors over-expressing MYC
Source: Springer Nature journal article supplement (doi:10.1038/nm1606), 2007-06-24
Supplement: 41591_2007_BFnm1606_MOESM304_ESM.pdf [file 41591_2007_BFnm1606_MOESM304_ESM.pdf]

**Supplementary Fig. 3**

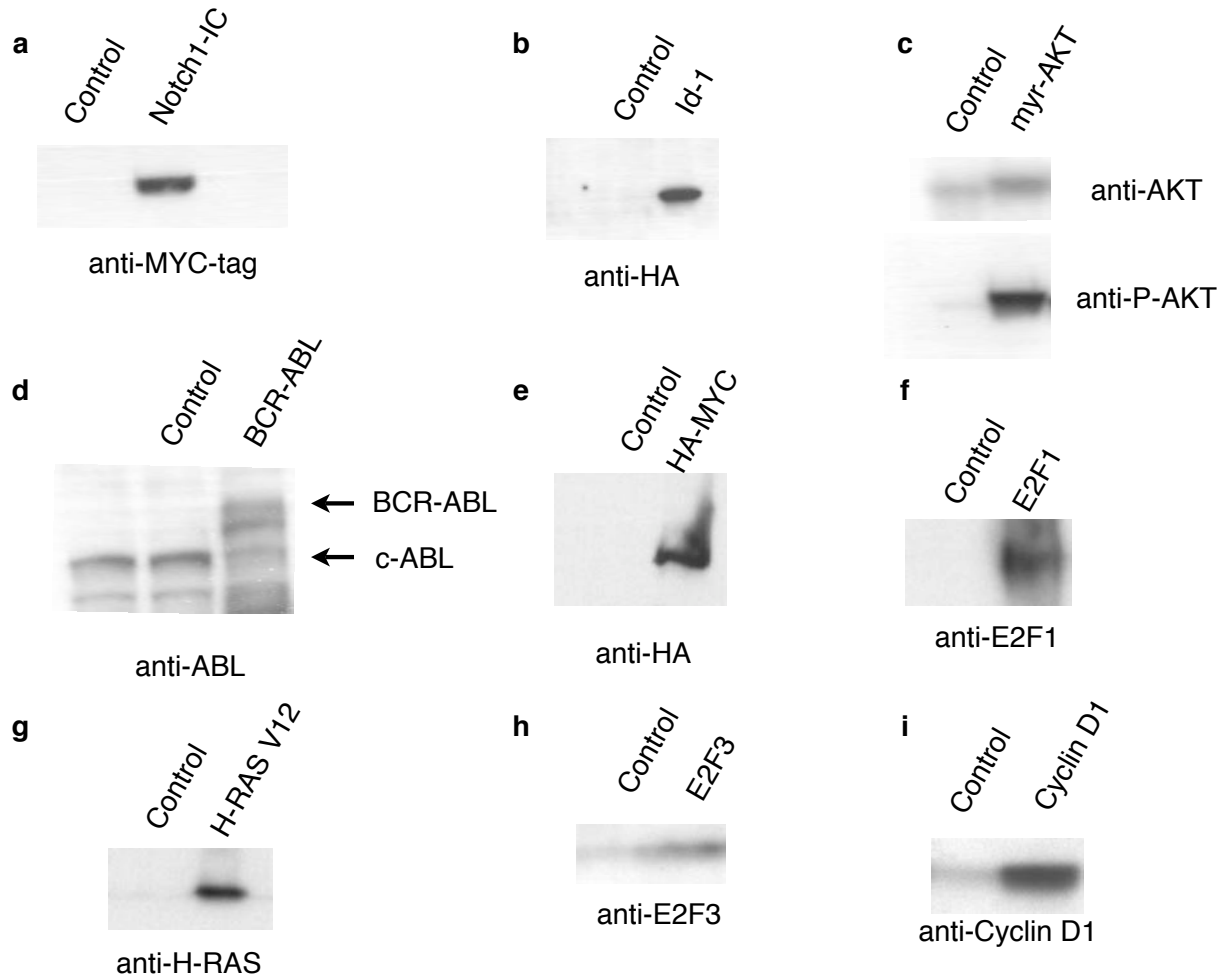

**Supplemental Fig. 3:** Expression of oncogenes in Rat1 fibroblasts. Western blotting analysis of oncoprotein expression in Rat1 cells infected with the indicated recombinant retrovirus. Western blotting was performed with the antibodies indicated for each blot. HA = hemagglutinin tag epitope. P-AKT = phosphorylated AKT.
